# Supplementary material for: Effect of Supplementation with Olive Leaf Extract Enriched with Oleuropein on the Metabolome and Redox Status of Athletes’ Blood and Urine—A Metabolomic Approach
Source: MDPI journal article supplement (doi:10.3390/metabo12020195), 2022-02-20
Supplement: s1 [file s1]

Supplementary SA. Figures

Contents

Figure SA1. .... 2

Figure SA2. .... 2

Figure SA3. .... 3

Figure SA4. .... 3

Figure SA5. .... 4

Figure SA6. .... 4

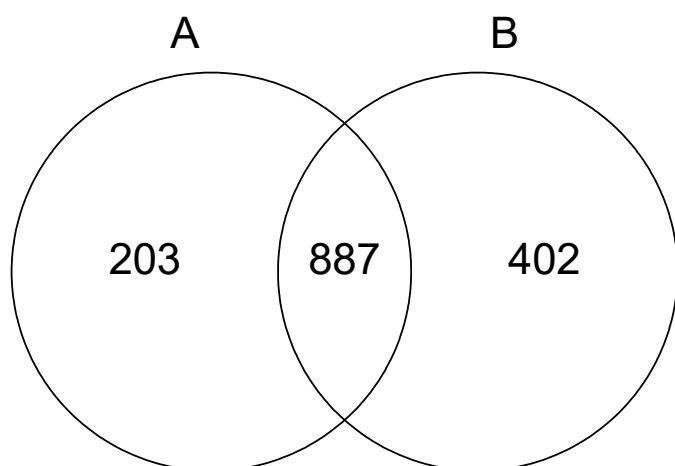

**Figure SA1.** Venn diagram from the two tested algorithms; “baseline cut-off” (A) and “Wavelets” (B) 887 common features are in the common section.

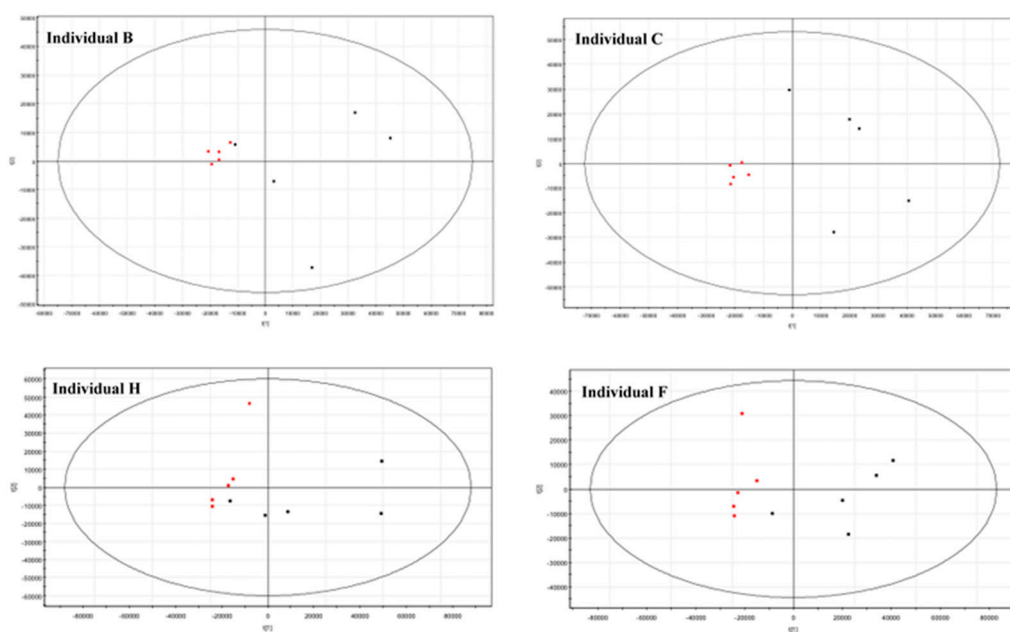

**Figure SA2.** PCA scores plots of representative individuals’ (B, C, H and F) urine samples (P and O) after UV scaling, obtained from UHPLC-(+)ESI-HRMS analysis. A clear trend towards the differentiation between P (red) and O (black) samples was observed in each individual separately.

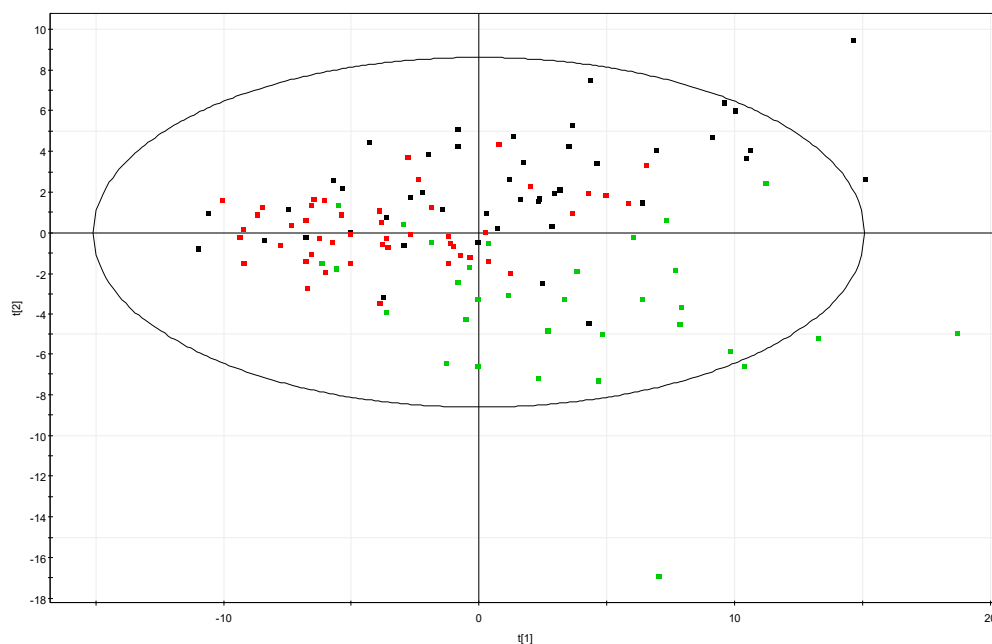

**Figure SA3.** PLS-DA scores plot (UV scaled) of B, P and O urine samples from all the days of the administration, obtained by UHPLC-(+)ESI-HRMS. No significant clustering was observed between the B samples (green points) the O samples (black points) and the P samples (red points).

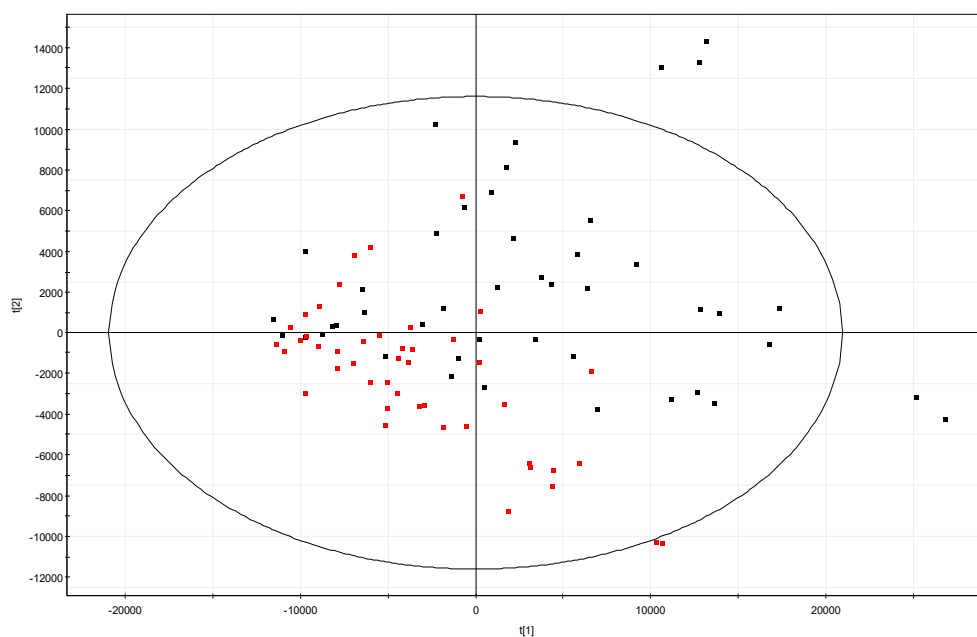

**Figure SA4.** PLS-DA scores plot (UV scaled) of P and O urine samples from all the days of the administration, obtained by UHPLC-(+)ESI-HRMS. No significant clustering was observed between the O samples (black points) and the P samples (red points).

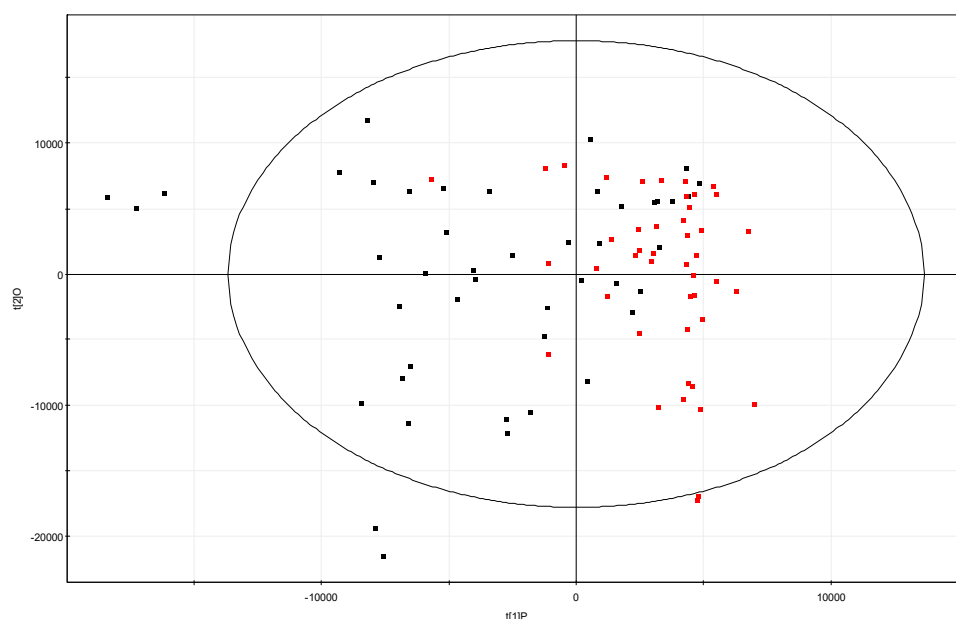

**Figure SA5.** OPLS-DA scores plot (UV scaled) of P and O urine samples from all the days of the administration, obtained by UHPLC-(+)ESI-HRMS. No significant clustering was observed between the O samples (black points) and the P samples (red points), even if they have the tendency to form two separate classes/groups.

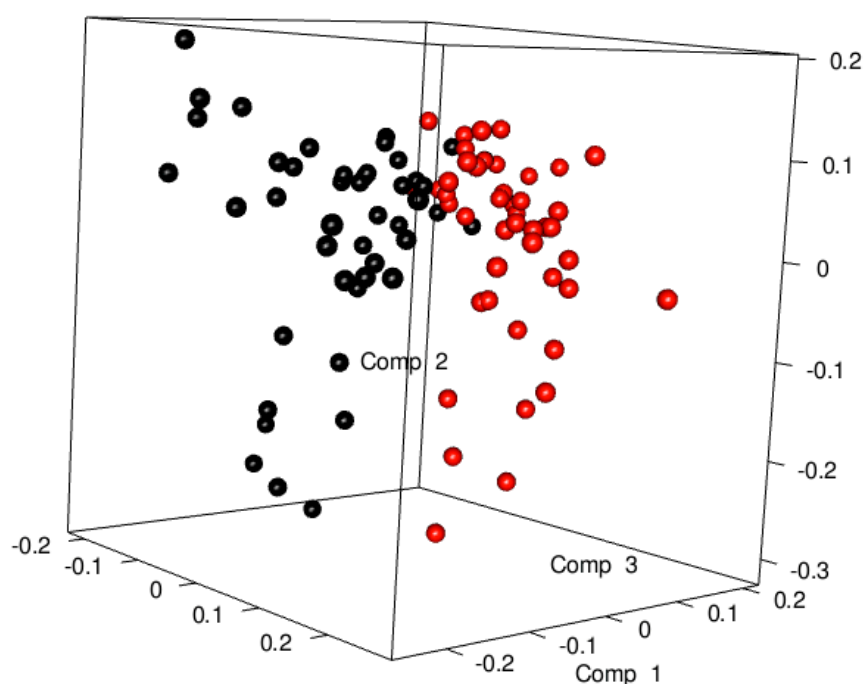

**Figure SA6.** 2-level ML-PLS-DA analysis of the P and O urine samples from all the days of administration, obtained by UHPLC-(+)ESI-HRMS. The 3-D multilevel PLS-DA scores plot (Comp 1, Comp 2, Comp 3) of the combination of the within subject variation and the day-based effect ( $\text{Var}_{\text{within}} + \text{Var}_{\text{day}}$ ) with the biological variation ( $\text{Var}_{\text{between}}$ ) being subtracted is shown. Red circles represent the P samples. Black circles represent the O samples. A clear clustering between P and O samples, is shown.
