# Supplementary material for: Effect of Supplementation with Olive Leaf Extract Enriched with Oleuropein on the Metabolome and Redox Status of Athletes’ Blood and Urine—A Metabolomic Approach
Source: MDPI journal article supplement (doi:10.3390/metabo12020195), 2022-02-20
Supplement: s1 [file s1]

Supplementary SB. Tables

Contents

Table SB1..... 2

Table SB2..... 3

Table SB3..... 3

Table SB4. .... 3

Table SB5..... 4

**Table SB1.** A list of the tested samples along with their corresponding labels, used for the examination of each individual separately. Oleuropein samples (O) are in black and placebo (P) samples are in red. Baseline samples (Days “-1” and “0”) (light grey) were not considered in this step of MVA.

| Weeks    |      | 1 <sup>st</sup> week |    |    |    |    |    |    | 2 <sup>nd</sup> week |     |     |     |     |     |     |
|----------|------|----------------------|----|----|----|----|----|----|----------------------|-----|-----|-----|-----|-----|-----|
|          |      | Days                 |    |    |    |    |    |    | Days                 |     |     |     |     |     |     |
| Subjects | Days | -1                   | 0  | 1  | 2  | 3  | 4  | 5  | -1                   | 0   | 1   | 2   | 3   | 4   | 5   |
| A        |      | 1                    | 11 | 21 | 31 | 41 | 51 | 61 | 1B                   | 11B | 21B | 31B | 41B | 51B | 61B |

| Weeks    |      | 1 <sup>st</sup> week |    |    |    |    |    |    | 2 <sup>nd</sup> week |     |     |     |     |     |     |
|----------|------|----------------------|----|----|----|----|----|----|----------------------|-----|-----|-----|-----|-----|-----|
|          |      | Days                 |    |    |    |    |    |    | Days                 |     |     |     |     |     |     |
| Subjects | Days | -1                   | 0  | 1  | 2  | 3  | 4  | 5  | -1                   | 0   | 1   | 2   | 3   | 4   | 5   |
| B        |      | 3                    | 13 | 23 | 33 | 43 | 53 | 63 | 3B                   | 13B | 23B | 33B | 43B | 53B | 63B |

| Weeks    |      | 1 <sup>st</sup> week |    |    |    |    |    |    | 2 <sup>nd</sup> week |     |     |     |     |     |     |
|----------|------|----------------------|----|----|----|----|----|----|----------------------|-----|-----|-----|-----|-----|-----|
|          |      | Days                 |    |    |    |    |    |    | Days                 |     |     |     |     |     |     |
| Subjects | Days | -1                   | 0  | 1  | 2  | 3  | 4  | 5  | -1                   | 0   | 1   | 2   | 3   | 4   | 5   |
| C        |      | 4                    | 14 | 24 | 34 | 44 | 54 | 64 | 4B                   | 14B | 24B | 34B | 44B | 54B | 64B |

| Weeks    |      | 1 <sup>st</sup> week |    |    |    |    |    |    | 2 <sup>nd</sup> week |     |     |     |     |     |     |
|----------|------|----------------------|----|----|----|----|----|----|----------------------|-----|-----|-----|-----|-----|-----|
|          |      | Days                 |    |    |    |    |    |    | Days                 |     |     |     |     |     |     |
| Subjects | Days | -1                   | 0  | 1  | 2  | 3  | 4  | 5  | -1                   | 0   | 1   | 2   | 3   | 4   | 5   |
| D        |      | 5                    | 15 | 25 | 35 | 45 | 55 | 65 | 5B                   | 15B | 25B | 35B | 45B | 55B | 65B |

| Weeks    |      | 1 <sup>st</sup> week |    |    |    |    |    |    | 2 <sup>nd</sup> week |     |     |     |     |     |     |
|----------|------|----------------------|----|----|----|----|----|----|----------------------|-----|-----|-----|-----|-----|-----|
|          |      | Days                 |    |    |    |    |    |    | Days                 |     |     |     |     |     |     |
| Subjects | Days | -1                   | 0  | 1  | 2  | 3  | 4  | 5  | -1                   | 0   | 1   | 2   | 3   | 4   | 5   |
| E        |      | 6                    | 16 | 26 | 36 | 46 | 56 | 66 | 6B                   | 16B | 26B | 36B | 46B | 56B | 66B |

| Weeks    |      | 1 <sup>st</sup> week |    |    |    |    |    |    | 2 <sup>nd</sup> week |     |     |     |     |     |     |
|----------|------|----------------------|----|----|----|----|----|----|----------------------|-----|-----|-----|-----|-----|-----|
|          |      | Days                 |    |    |    |    |    |    | Days                 |     |     |     |     |     |     |
| Subjects | Days | -1                   | 0  | 1  | 2  | 3  | 4  | 5  | -1                   | 0   | 1   | 2   | 3   | 4   | 5   |
| F        |      | 7                    | 17 | 27 | 37 | 47 | 57 | 67 | 7B                   | 17B | 27B | 37B | 47B | 57B | 67B |

| Weeks    |      | 1 <sup>st</sup> week |    |    |    |    |    |    | 2 <sup>nd</sup> week |     |     |     |     |     |     |
|----------|------|----------------------|----|----|----|----|----|----|----------------------|-----|-----|-----|-----|-----|-----|
|          |      | Days                 |    |    |    |    |    |    | Days                 |     |     |     |     |     |     |
| Subjects | Days | -1                   | 0  | 1  | 2  | 3  | 4  | 5  | -1                   | 0   | 1   | 2   | 3   | 4   | 5   |
| G        |      | 8                    | 18 | 28 | 38 | 48 | 58 | 68 | 8B                   | 18B | 28B | 38B | 48B | 58B | 68B |

| Weeks    |      | 1 <sup>st</sup> week |    |    |    |    |    |    | 2 <sup>nd</sup> week |     |     |     |     |     |     |
|----------|------|----------------------|----|----|----|----|----|----|----------------------|-----|-----|-----|-----|-----|-----|
|          |      | Days                 |    |    |    |    |    |    | Days                 |     |     |     |     |     |     |
| Subjects | Days | -1                   | 0  | 1  | 2  | 3  | 4  | 5  | -1                   | 0   | 1   | 2   | 3   | 4   | 5   |
| H        |      | 9                    | 19 | 29 | 39 | 49 | 59 | 69 | 9B                   | 19B | 29B | 39B | 49B | 59B | 69B |

| Weeks    |      | 1 <sup>st</sup> week |    |    |    |    |    |    | 2 <sup>nd</sup> week |     |     |     |     |     |     |
|----------|------|----------------------|----|----|----|----|----|----|----------------------|-----|-----|-----|-----|-----|-----|
|          |      | Days                 |    |    |    |    |    |    | Days                 |     |     |     |     |     |     |
| Subjects | Days | -1                   | 0  | 1  | 2  | 3  | 4  | 5  | -1                   | 0   | 1   | 2   | 3   | 4   | 5   |
| I        |      | 10                   | 20 | 30 | 40 | 50 | 60 | 70 | 10B                  | 20B | 30B | 40B | 50B | 60B | 70B |

**Table SB2.** ANOVA results for the significant metabolite M1.

| Analysis of Variance (One-Way) Metabolite M1 |             |             |              |             |         |         |
|----------------------------------------------|-------------|-------------|--------------|-------------|---------|---------|
| Summary                                      |             |             |              |             |         |         |
| Groups                                       | Sample size | Sum         | Mean         | Variance    |         |         |
| O                                            | 18          | 15558222.91 | 864345.71722 | 3.73796E+11 |         |         |
| P                                            | 18          | 7690860.74  | 427270.04111 | 1.58347E+11 |         |         |
| ANOVA                                        |             |             |              |             |         |         |
| Source of Variation                          | SS          | df          | MS           | F           | p-level | F crit  |
| Between Groups                               | 1.71932E+12 | 1           | 1.71932E+12  | 6.46186     | 0.01575 | 4.13002 |
| Within Groups                                | 9.04643E+12 | 34          | 2.66071E+11  |             |         |         |
| Total                                        | 1.07657E+13 | 35          |              |             |         |         |

**Table SB3.** ANOVA results for the significant metabolite M5.

| Analysis of Variance (One-Way) Metabolite M5 |             |             |              |             |         |         |
|----------------------------------------------|-------------|-------------|--------------|-------------|---------|---------|
| Summary                                      |             |             |              |             |         |         |
| Groups                                       | Sample size | Sum         | Mean         | Variance    |         |         |
| O                                            | 18          | 6153587.153 | 341865.95294 | 1.68643E+11 |         |         |
| P                                            | 18          | 2147063.846 | 119281.32478 | 3.20009E+10 |         |         |
| ANOVA                                        |             |             |              |             |         |         |
| Source of Variation                          | SS          | df          | MS           | F           | p-level | F crit  |
| Between Groups                               | 4.45895E+11 | 1           | 4.45895E+11  | 4.44463     | 0.0426  | 4.13002 |
| Within Groups                                | 3.41095E+12 | 34          | 1.00322E+11  |             |         |         |
| Total                                        | 3.85685E+12 | 35          |              |             |         |         |

**Table SB4.** ANOVA results for the significant metabolite M19.

| Analysis of Variance (One-Way) Metabolite M19 |             |              |               |                  |          |        |
|-----------------------------------------------|-------------|--------------|---------------|------------------|----------|--------|
| Summary                                       |             |              |               |                  |          |        |
| Groups                                        | Sample size | Sum          | Mean          | Variance         |          |        |
| O                                             | 18          | 33925758.693 | 1884764.37183 | 1.02931E+13      |          |        |
| P                                             | 18          | 623969.718   | 34664.98433   | 1016438443.15771 |          |        |
| ANOVA                                         |             |              |               |                  |          |        |
| Source of Variation                           | SS          | df           | MS            | F                | p- level | F crit |

|                |             |    |             |         |         |        |
|----------------|-------------|----|-------------|---------|---------|--------|
| Between Groups | 3.08058E+13 | 1  | 3.08058E+13 | 5.98514 | 0.01975 | 4.1302 |
| Within Groups  | 1.75E+14    | 34 | 5.14705E+12 |         |         |        |
| Total          | 2.05805E+14 | 35 |             |         |         |        |

**Table SB5.** A list of the tested samples from the crossover study along with their corresponding labels. Baseline samples (B) are in green, oleuropein samples (O) are in black and placebo (P) samples are in red.

| Weeks    |      | 1 <sup>st</sup> week |    |    |    |    |    |    | 2 weeks wash out | 2 <sup>nd</sup> week |     |     |     |     |     |     |
|----------|------|----------------------|----|----|----|----|----|----|------------------|----------------------|-----|-----|-----|-----|-----|-----|
| Subjects | Days | -1                   | 0  | 1  | 2  | 3  | 4  | 5  |                  | -1                   | 0   | 1   | 2   | 3   | 4   | 5   |
| A        |      | 1                    | 11 | 21 | 31 | 41 | 51 | 61 |                  | 1B                   | 11B | 21B | 31B | 41B | 51B | 61B |
| B        |      | 3                    | 13 | 23 | 33 | 43 | 53 | 63 |                  | 3B                   | 13B | 23B | 33B | 43B | 53B | 63B |
| C        |      | 4                    | 14 | 24 | 34 | 44 | 54 | 64 |                  | 4B                   | 14B | 24B | 34B | 44B | 54B | 64B |
| D        |      | 5                    | 15 | 25 | 35 | 45 | 55 | 65 |                  | 5B                   | 15B | 25B | 35B | 45B | 55B | 65B |
| E        |      | 6                    | 16 | 26 | 36 | 46 | 56 | 66 |                  | 6B                   | 16B | 26B | 36B | 46B | 56B | 66B |
| F        |      | 7                    | 17 | 27 | 37 | 47 | 57 | 67 |                  | 7B                   | 17B | 27B | 37B | 47B | 57B | 67B |
| G        |      | 8                    | 18 | 28 | 38 | 48 | 58 | 68 |                  | 8B                   | 18B | 28B | 38B | 48B | 58B | 68B |
| H        |      | 9                    | 19 | 29 | 39 | 49 | 59 | 69 |                  | 9B                   | 19B | 29B | 39B | 49B | 59B | 69B |
| I        |      | 10                   | 20 | 30 | 40 | 50 | 60 | 70 | 10B              | 20B                  | 30B | 40B | 50B | 60B | 70B |     |
